# Supplementary material for: Effect of Silver Powder Microstructure on the Performance of Silver Powder and Front-Side Solar Silver Paste
Source: MDPI journal article supplement (doi:10.3390/ma17020445), 2024-01-17
Supplement: s1 [file s1]

The DSC-TG test results for silver powders S1-S3 are illustrated in Figure S1. In Figure 4 of the manuscript, the DSC curves of silver powders S1-S3 were placed in one figure, so the TG curves were omitted.

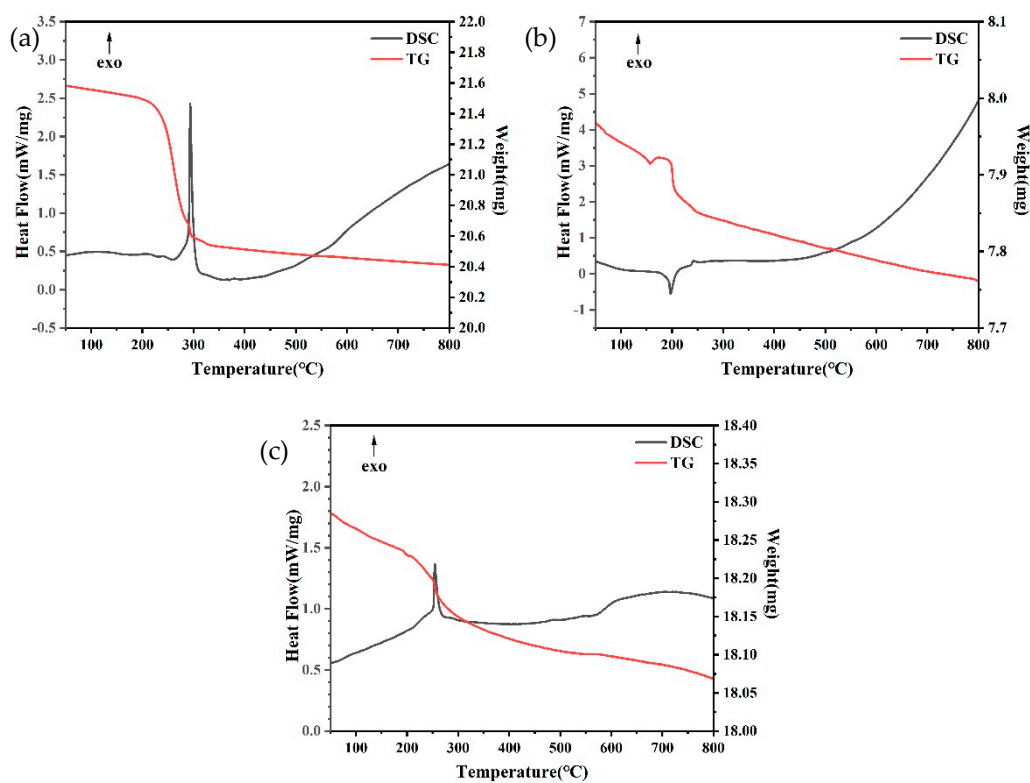

**Figure S1.** DSC-TG curve of silver powders, (a) S1, (b) S2, (c) S3.
